# Supplementary material for: Phenanthroimidazole derivatives as a chemosensor for picric acid: a first realistic approach
Source: Royal Society of Chemistry journal article supplement (doi:10.1039/d0nj03422c), 2020-01-01
Supplement: d0nj03422c1.pdf [file d0nj03422c1.pdf]

## Supplementary Information

### **Phenanthreneimidazole derivatives as Chemosensor for Picric Acid: A First Realistic**

#### **Approach**

Ruby Ahmed<sup>a</sup>, Abid Ali<sup>a</sup>, Musheer Ahmad<sup>a</sup>, Ali Alsalmeh<sup>b</sup>, Rais Ahmad Khan<sup>\*b</sup>, and  
Farman Ali<sup>\*a</sup>

<sup>a</sup> *Department of Applied Chemistry, Zakir Hussain College of Engineering and Technology, AMU, Aligarh 202002. Email: [farmanfrequent@gmail.com](mailto:farmanfrequent@gmail.com), [amusheer4@gmail.com](mailto:amusheer4@gmail.com), [abidaliamu4@gmail.com](mailto:abidaliamu4@gmail.com), [ahmedruby1974@gmail.com](mailto:ahmedruby1974@gmail.com)*

<sup>b</sup> *Department of Chemistry, College of Sciences, King Saud University, P.O. Box 2455, Riyadh, 11451, KSA. Email: [aalsalme@ksu.edu.sa](mailto:aalsalme@ksu.edu.sa) and [krais@ksu.edu.sa](mailto:krais@ksu.edu.sa)*

**Table S1 Fractional Atomic Coordinates ( $\times 10^4$ ) and Equivalent Isotropic Displacement Parameters ( $\text{\AA}^2 \times 10^3$ ) for  $M1^+PA^-$ .  $U_{eq}$  is defined as 1/3 of the trace of the orthogonalised  $U_{ij}$  tensor.**

| Atom | <i>x</i>  | <i>y</i>    | <i>z</i>    | $U(eq)$  |
|------|-----------|-------------|-------------|----------|
| O1   | 6719 (3)  | 4699.4 (17) | 4742.2 (18) | 33.2 (5) |
| O2   | 9334 (3)  | 4510.7 (17) | 5682.7 (17) | 30.0 (5) |
| O3   | 8550 (3)  | 1283.3 (18) | 6280.8 (17) | 35.9 (6) |
| O4   | 6945 (4)  | -273.0 (19) | 4934 (2)    | 62.8 (8) |
| O5   | 4321 (3)  | -554.1 (16) | 1419.2 (17) | 34.4 (5) |
| O6   | 4079 (3)  | 862.8 (17)  | 1102.5 (17) | 36.1 (6) |
| O7   | 5727 (3)  | 2880.9 (15) | 2713.3 (16) | 22.9 (5) |
| N1   | 7772 (4)  | 4129 (2)    | 4985 (2)    | 24.2 (6) |
| N2   | 7546 (4)  | 726 (2)     | 5330 (2)    | 31.4 (6) |
| N3   | 4610 (3)  | 463 (2)     | 1733 (2)    | 25.0 (6) |
| N4   | -332 (3)  | 3712.5 (19) | 1671.6 (19) | 20.9 (5) |
| N5   | 2649 (3)  | 3942.1 (18) | 2533.6 (19) | 21.6 (6) |
| C1   | 7120 (4)  | 2931 (2)    | 4449 (2)    | 19.7 (6) |
| C2   | 7585 (4)  | 2420 (2)    | 5107 (2)    | 21.2 (6) |
| C3   | 7029 (4)  | 1282 (2)    | 4650 (2)    | 23.3 (7) |
| C4   | 6057 (4)  | 663 (2)     | 3547 (2)    | 24.4 (7) |
| C5   | 5613 (4)  | 1183 (2)    | 2886 (2)    | 20.9 (6) |
| C6   | 6094 (4)  | 2370 (2)    | 3285 (2)    | 19.1 (6) |
| C7   | 924 (4)   | 3275 (2)    | 2142 (2)    | 21.1 (6) |
| C8   | 526 (4)   | 2249 (2)    | 2237 (2)    | 21.9 (6) |
| C9   | 1342 (4)  | 2229 (2)    | 3231 (2)    | 25.2 (7) |
| C10  | 1070 (4)  | 1245 (2)    | 3314 (3)    | 27.5 (7) |
| C11  | -9 (4)    | 285 (2)     | 2410 (3)    | 26.8 (7) |
| C12  | -839 (4)  | 311 (2)     | 1423 (3)    | 27.2 (7) |
| C13  | -580 (4)  | 1292 (2)    | 1335 (2)    | 24.3 (7) |
| C14  | 619 (4)   | 4696 (2)    | 1764 (2)    | 19.3 (6) |
| C15  | -77 (4)   | 5457 (2)    | 1387 (2)    | 19.6 (6) |
| C16  | -1993 (4) | 5309 (2)    | 825 (2)     | 21.3 (6) |
| C17  | -2590 (4) | 6059 (2)    | 465 (2)     | 24.6 (7) |
| C18  | -1251 (4) | 6989 (2)    | 681 (2)     | 25.3 (7) |
| C19  | 640 (4)   | 7141 (2)    | 1222 (2)    | 21.2 (6) |
| C20  | 1298 (4)  | 6384 (2)    | 1595 (2)    | 19.2 (6) |
| C21  | 3319 (4)  | 6528 (2)    | 2172 (2)    | 19.7 (6) |
| C22  | 4718 (4)  | 7429 (2)    | 2386 (2)    | 24.7 (7) |
| C23  | 6592 (4)  | 7573 (2)    | 2955 (2)    | 28.9 (7) |
| C24  | 7149 (4)  | 6821 (3)    | 3347 (2)    | 29.0 (7) |
| C25  | 5850 (4)  | 5915 (2)    | 3136 (2)    | 25.1 (7) |
| C26  | 3937 (4)  | 5754 (2)    | 2547 (2)    | 20.6 (6) |

|     |          |             |            |          |
|-----|----------|-------------|------------|----------|
| C27 | 2507 (4) | 4837 (2)    | 2308 (2)   | 19.7 (6) |
| O8  | 5883 (3) | 2659.1 (16) | 665.6 (17) | 26.3 (5) |

**Table S2 Anisotropic Displacement Parameters ( $\text{\AA}^2 \times 10^3$ ) for  $\text{M1}^+\text{-PA}^-$ . The Anisotropic displacement factor exponent takes the form:  $-2\pi^2[\text{h}^2\text{a}^2\text{U}_{11}+2\text{hka}^*\text{b}^*\text{U}_{12}+\dots]$ .**

| Atom | $\text{U}_{11}$ | $\text{U}_{22}$ | $\text{U}_{33}$ | $\text{U}_{12}$ | $\text{U}_{13}$ | $\text{U}_{23}$ |
|------|-----------------|-----------------|-----------------|-----------------|-----------------|-----------------|
| O1   | 42.4 (13)       | 26.4 (13)       | 36.4 (13)       | 15.0 (11)       | 12.8 (11)       | 16.4 (11)       |
| O2   | 32.8 (12)       | 30.8 (13)       | 22.1 (12)       | -3.5 (10)       | 3.1 (10)        | 11.3 (10)       |
| O3   | 48.2 (14)       | 36.8 (14)       | 22.1 (12)       | 10.4 (11)       | -0.9 (11)       | 16.1 (11)       |
| O4   | 126 (2)         | 24.4 (14)       | 30.7 (14)       | 6.8 (15)        | -4.4 (15)       | 15.9 (12)       |
| O5   | 53.3 (14)       | 19.9 (12)       | 24.0 (12)       | -2.5 (10)       | 2.9 (11)        | 8.6 (10)        |
| O6   | 48.4 (14)       | 33.3 (13)       | 24.1 (12)       | -3.4 (11)       | -6.2 (11)       | 18.5 (11)       |
| O7   | 25.5 (10)       | 25.8 (11)       | 24.0 (11)       | 8.6 (9)         | 6.6 (9)         | 16.4 (10)       |
| N1   | 31.3 (14)       | 23.0 (14)       | 20.8 (14)       | 5.0 (12)        | 10.5 (12)       | 10.5 (12)       |
| N2   | 49.7 (17)       | 24.1 (16)       | 21.0 (15)       | 10.5 (13)       | 5.4 (13)        | 11.0 (13)       |
| N3   | 28.4 (13)       | 25.2 (15)       | 23.1 (14)       | -0.3 (11)       | 4.7 (11)        | 14.1 (12)       |
| N4   | 21.5 (12)       | 24.4 (14)       | 20.2 (13)       | 5.9 (10)        | 5.0 (11)        | 12.9 (11)       |
| N5   | 22.5 (13)       | 24.7 (14)       | 21.1 (13)       | 6.7 (11)        | 4.9 (11)        | 13.4 (12)       |
| C1   | 18.4 (14)       | 19.0 (15)       | 21.7 (16)       | 1.9 (12)        | 6.0 (13)        | 8.9 (13)        |
| C2   | 20.1 (14)       | 25.6 (17)       | 18.4 (16)       | 7.2 (12)        | 6.3 (13)        | 9.4 (14)        |
| C3   | 30.8 (16)       | 24.9 (17)       | 18.4 (16)       | 7.0 (13)        | 6.9 (13)        | 13.0 (14)       |
| C4   | 31.6 (16)       | 21.0 (16)       | 23.7 (17)       | 7.3 (13)        | 8.1 (14)        | 12.1 (14)       |
| C5   | 21.9 (14)       | 23.7 (16)       | 15.6 (15)       | 0.7 (12)        | 1.0 (12)        | 9.3 (13)        |
| C6   | 18.3 (14)       | 23.5 (16)       | 20.2 (16)       | 6.7 (12)        | 8.0 (12)        | 12.2 (14)       |
| C7   | 27.2 (16)       | 22.5 (16)       | 15.5 (15)       | 6.0 (13)        | 6.7 (13)        | 9.5 (13)        |
| C8   | 24.3 (15)       | 22.3 (16)       | 24.0 (16)       | 5.4 (13)        | 8.7 (13)        | 13.7 (14)       |
| C9   | 27.6 (16)       | 25.7 (17)       | 27.2 (17)       | 6.6 (13)        | 8.5 (14)        | 15.3 (15)       |
| C10  | 29.1 (16)       | 33.4 (19)       | 30.5 (18)       | 10.9 (14)       | 11.0 (14)       | 21.8 (16)       |
| C11  | 29.6 (16)       | 23.5 (17)       | 34.6 (19)       | 7.3 (14)        | 11.0 (15)       | 18.2 (15)       |
| C12  | 28.8 (16)       | 23.3 (17)       | 30.1 (18)       | 5.5 (13)        | 7.9 (14)        | 12.3 (15)       |
| C13  | 27.7 (16)       | 26.6 (17)       | 25.6 (17)       | 9.9 (13)        | 9.1 (14)        | 16.1 (15)       |
| C14  | 23.0 (15)       | 18.3 (15)       | 16.9 (15)       | 3.3 (12)        | 7.8 (12)        | 7.2 (13)        |
| C15  | 25.1 (15)       | 18.5 (15)       | 15.9 (15)       | 7.0 (12)        | 6.9 (12)        | 7.2 (13)        |
| C16  | 24.0 (15)       | 20.7 (16)       | 18.1 (15)       | 4.7 (13)        | 5.3 (13)        | 7.6 (13)        |
| C17  | 25.5 (16)       | 28.2 (17)       | 18.9 (16)       | 8.8 (13)        | 3.9 (13)        | 9.5 (14)        |
| C18  | 33.9 (17)       | 24.8 (17)       | 22.6 (16)       | 13.5 (14)       | 9.4 (14)        | 13.4 (14)       |
| C19  | 27.9 (16)       | 16.9 (15)       | 19.8 (16)       | 4.3 (13)        | 9.0 (13)        | 7.7 (13)        |
| C20  | 24.9 (15)       | 17.9 (15)       | 13.4 (14)       | 4.8 (12)        | 5.9 (12)        | 5.1 (12)        |
| C21  | 24.4 (15)       | 19.6 (15)       | 14.5 (14)       | 4.8 (12)        | 6.9 (12)        | 6.1 (12)        |

|     |           |           |           |           |          |           |
|-----|-----------|-----------|-----------|-----------|----------|-----------|
| C22 | 27.0 (16) | 21.6 (16) | 23.3 (16) | 5.9 (13)  | 9.4 (14) | 6.6 (14)  |
| C23 | 25.9 (16) | 25.7 (17) | 27.7 (18) | -2.4 (13) | 9.2 (14) | 5.4 (15)  |
| C24 | 21.5 (15) | 35.0 (19) | 24.7 (17) | 6.3 (14)  | 3.7 (14) | 8.9 (15)  |
| C25 | 24.8 (16) | 28.3 (17) | 22.8 (16) | 7.9 (13)  | 7.9 (13) | 10.7 (14) |
| C26 | 24.3 (15) | 21.3 (16) | 15.5 (15) | 4.8 (12)  | 7.9 (12) | 6.3 (13)  |
| C27 | 23.2 (15) | 22.0 (16) | 19.3 (16) | 7.5 (12)  | 7.6 (13) | 12.8 (13) |
| O8  | 31.8 (11) | 25.3 (12) | 23.6 (12) | 3.3 (10)  | 4.9 (10) | 13.7 (10) |

**Table S3 Bond Lengths for M1<sup>+</sup>-PA<sup>-</sup>.**

| Atom | Atom | Length/Å  | Atom | Atom | Length/Å  |
|------|------|-----------|------|------|-----------|
| O1   | N1   | 1.226 (3) | C8   | C13  | 1.392 (4) |
| O2   | N1   | 1.233 (3) | C9   | C10  | 1.388 (4) |
| O3   | N2   | 1.229 (3) | C10  | C11  | 1.390 (4) |
| O4   | N2   | 1.227 (3) | C11  | C12  | 1.389 (4) |
| O5   | N3   | 1.243 (3) | C12  | C13  | 1.387 (4) |
| O6   | N3   | 1.225 (3) | C14  | C15  | 1.424 (4) |
| O7   | C6   | 1.258 (3) | C14  | C27  | 1.373 (4) |
| N1   | C1   | 1.459 (3) | C15  | C16  | 1.396 (4) |
| N2   | C3   | 1.448 (3) | C15  | C20  | 1.421 (4) |
| N3   | C5   | 1.454 (3) | C16  | C17  | 1.374 (4) |
| N4   | C7   | 1.333 (3) | C17  | C18  | 1.404 (4) |
| N4   | C14  | 1.390 (3) | C18  | C19  | 1.371 (4) |
| N5   | C7   | 1.336 (3) | C19  | C20  | 1.407 (4) |
| N5   | C27  | 1.382 (3) | C20  | C21  | 1.468 (4) |
| C1   | C2   | 1.366 (4) | C21  | C22  | 1.402 (4) |
| C1   | C6   | 1.449 (4) | C21  | C26  | 1.420 (4) |
| C2   | C3   | 1.384 (4) | C22  | C23  | 1.374 (4) |
| C3   | C4   | 1.380 (4) | C23  | C24  | 1.395 (4) |
| C4   | C5   | 1.377 (4) | C24  | C25  | 1.366 (4) |
| C5   | C6   | 1.449 (4) | C25  | C26  | 1.403 (4) |
| C7   | C8   | 1.463 (4) | C26  | C27  | 1.421 (4) |
| C8   | C9   | 1.393 (4) |      |      |           |

**Table S4 Bond Angles for M1<sup>+</sup>-PA<sup>-</sup>.**

| Atom | Atom | Atom | Angle/°   | Atom | Atom | Atom | Angle/°   |
|------|------|------|-----------|------|------|------|-----------|
| O2   | N1   | O1   | 123.8 (2) | C10  | C9   | C8   | 119.6 (3) |
| C1   | N1   | O1   | 118.5 (2) | C11  | C10  | C9   | 120.2 (3) |
| C1   | N1   | O2   | 117.7 (2) | C12  | C11  | C10  | 120.0 (3) |

|     |    |    |           |     |     |     |           |
|-----|----|----|-----------|-----|-----|-----|-----------|
| O4  | N2 | O3 | 123.4 (2) | C13 | C12 | C11 | 120.1 (3) |
| C3  | N2 | O3 | 118.1 (2) | C12 | C13 | C8  | 119.8 (3) |
| C3  | N2 | O4 | 118.5 (3) | C15 | C14 | N4  | 130.5 (2) |
| O6  | N3 | O5 | 121.9 (2) | C27 | C14 | N4  | 106.7 (2) |
| C5  | N3 | O5 | 118.1 (2) | C27 | C14 | C15 | 122.8 (3) |
| C5  | N3 | O6 | 120.0 (2) | C16 | C15 | C14 | 122.9 (3) |
| C14 | N4 | C7 | 108.9 (2) | C20 | C15 | C14 | 116.4 (2) |
| C27 | N5 | C7 | 109.3 (2) | C20 | C15 | C16 | 120.7 (3) |
| C2  | C1 | N1 | 115.5 (2) | C17 | C16 | C15 | 120.7 (3) |
| C6  | C1 | N1 | 119.5 (2) | C18 | C17 | C16 | 119.1 (3) |
| C6  | C1 | C2 | 125.0 (3) | C19 | C18 | C17 | 120.9 (3) |
| C3  | C2 | C1 | 118.6 (3) | C20 | C19 | C18 | 121.3 (3) |
| C2  | C3 | N2 | 119.3 (3) | C19 | C20 | C15 | 117.2 (2) |
| C4  | C3 | N2 | 119.4 (3) | C21 | C20 | C15 | 120.5 (2) |
| C4  | C3 | C2 | 121.3 (3) | C21 | C20 | C19 | 122.2 (3) |
| C5  | C4 | C3 | 119.7 (3) | C22 | C21 | C20 | 122.1 (3) |
| C4  | C5 | N3 | 115.8 (2) | C26 | C21 | C20 | 120.9 (2) |
| C6  | C5 | N3 | 120.6 (2) | C26 | C21 | C22 | 117.0 (3) |
| C6  | C5 | C4 | 123.5 (3) | C23 | C22 | C21 | 121.6 (3) |
| C1  | C6 | O7 | 122.4 (3) | C24 | C23 | C22 | 120.3 (3) |
| C5  | C6 | O7 | 125.8 (3) | C25 | C24 | C23 | 120.2 (3) |
| C5  | C6 | C1 | 111.8 (2) | C26 | C25 | C24 | 119.9 (3) |
| N5  | C7 | N4 | 108.5 (2) | C25 | C26 | C21 | 120.9 (3) |
| C8  | C7 | N4 | 127.0 (2) | C27 | C26 | C21 | 116.2 (2) |
| C8  | C7 | N5 | 124.6 (2) | C27 | C26 | C25 | 122.9 (3) |
| C9  | C8 | C7 | 118.9 (3) | C14 | C27 | N5  | 106.6 (2) |
| C13 | C8 | C7 | 120.8 (3) | C26 | C27 | N5  | 130.4 (2) |
| C13 | C8 | C9 | 120.3 (3) | C26 | C27 | C14 | 123.1 (2) |

**Table S5 Hydrogen Atom Coordinates ( $\text{\AA} \times 10^4$ ) and Isotropic Displacement Parameters ( $\text{\AA}^2 \times 10^3$ ) for  $\text{M1}^+\text{-PA}^-$ .**

| Atom | <i>x</i>  | <i>y</i>    | <i>z</i>    | U(eq)    |
|------|-----------|-------------|-------------|----------|
| H4   | -1562 (3) | 3424.9 (19) | 1353.8 (19) | 25.1 (7) |
| H5   | 3708 (3)  | 3828.9 (18) | 2880.5 (19) | 25.9 (7) |
| H2   | 8276 (4)  | 2838 (2)    | 5863 (2)    | 25.4 (8) |
| H4a  | 5695 (4)  | -118 (2)    | 3246 (2)    | 29.3 (8) |
| H9   | 2080 (4)  | 2885 (2)    | 3849 (2)    | 30.2 (8) |
| H10  | 1624 (4)  | 1228 (2)    | 3991 (3)    | 33.0 (9) |
| H11  | -180 (4)  | -389 (2)    | 2466 (3)    | 32.1 (9) |
| H12  | -1585 (4) | -345 (2)    | 808 (3)     | 32.6 (8) |

|     |           |           |           |          |
|-----|-----------|-----------|-----------|----------|
| H13 | -1154 (4) | 1310 (2)  | 662 (2)   | 29.2 (8) |
| H16 | -2895 (4) | 4683 (2)  | 691 (2)   | 25.5 (8) |
| H17 | -3892 (4) | 5951 (2)  | 75 (2)    | 29.5 (8) |
| H18 | -1662 (4) | 7520 (2)  | 449 (2)   | 30.3 (8) |
| H19 | 1524 (4)  | 7770 (2)  | 1347 (2)  | 25.5 (8) |
| H22 | 4362 (4)  | 7953 (2)  | 2130 (2)  | 29.7 (8) |
| H23 | 7513 (4)  | 8188 (2)  | 3082 (2)  | 34.7 (9) |
| H24 | 8436 (4)  | 6940 (3)  | 3762 (2)  | 34.8 (9) |
| H25 | 6242 (4)  | 5395 (2)  | 3388 (2)  | 30.1 (8) |
| H8a | 5760 (40) | 2496 (19) | 1188 (13) | 39.5 (7) |
| H8b | 5690 (40) | 2036 (9)  | 93 (11)   | 39.5 (7) |

**Table S6 Fractional Atomic Coordinates ( $\times 10^4$ ) and Equivalent Isotropic Displacement Parameters ( $\text{\AA}^2 \times 10^3$ ) for  $\text{M3}^+\text{-PA}^-$ .  $U_{\text{eq}}$  is defined as 1/3 of the trace of the orthogonalised  $U_{\text{IJ}}$  tensor.**

| Atom | <i>x</i>   | <i>y</i>    | <i>z</i>    | $U(\text{eq})$ |
|------|------------|-------------|-------------|----------------|
| S1   | 8689.5 (8) | 4026.0 (2)  | 2406.3 (4)  | 29.59 (16)     |
| O8   | 9314 (2)   | 4094.7 (5)  | 3329.7 (10) | 29.7 (4)       |
| C38  | 9271 (5)   | 4530.4 (11) | 1931 (2)    | 48.1 (8)       |
| C39  | 10364 (4)  | 3676.9 (11) | 2068 (2)    | 44.5 (7)       |
| O1   | 7075 (2)   | 3572.5 (5)  | 7454.6 (10) | 36.2 (4)       |
| O2   | 9894 (3)   | 3176.7 (6)  | 6931.8 (13) | 49.6 (5)       |
| O3   | 10398 (3)  | 2494.1 (7)  | 7242.2 (14) | 54.9 (6)       |
| O4   | 5925 (3)   | 1561.5 (6)  | 8092.2 (11) | 40.5 (4)       |
| O5   | 3565 (2)   | 1835.1 (6)  | 8552.3 (11) | 37.3 (4)       |
| O6   | 3702 (4)   | 3770.1 (10) | 7647 (2)    | 29.8 (8)       |
| O6a  | 4695 (8)   | 3831.3 (15) | 8459 (4)    | 87.8 (19)      |
| O7   | 2755 (3)   | 3389.8 (7)  | 8642.4 (15) | 64.3 (7)       |
| N3   | 9440 (3)   | 2825.5 (7)  | 7219.1 (12) | 31.8 (5)       |
| N4   | 4985 (3)   | 1877.3 (6)  | 8245.1 (12) | 29.5 (5)       |
| N5   | 3890 (3)   | 3451.8 (8)  | 8216.8 (19) | 54.8 (7)       |
| C32  | 6663 (3)   | 3189.3 (8)  | 7645.9 (14) | 26.8 (5)       |
| C33  | 7709 (3)   | 2792.9 (8)  | 7536.4 (14) | 25.5 (5)       |
| C34  | 7164 (3)   | 2374.0 (8)  | 7725.1 (14) | 25.5 (5)       |
| C35  | 5571 (3)   | 2318.0 (7)  | 8056.9 (13) | 24.2 (5)       |
| C36  | 4525 (3)   | 2677.0 (8)  | 8222.2 (15) | 27.6 (5)       |
| C37  | 5063 (3)   | 3090.2 (8)  | 8028.7 (15) | 30.3 (5)       |
| N1   | 7252 (2)   | 3996.4 (6)  | 5982.7 (12) | 22.2 (4)       |
| N2   | 7861 (2)   | 4156.6 (6)  | 4733.8 (12) | 21.9 (4)       |
| C1   | 7147 (3)   | 4451.3 (7)  | 5901.0 (14) | 21.1 (5)       |
| C2   | 6669 (3)   | 4781.1 (7)  | 6470.3 (14) | 23.1 (5)       |
| C3   | 6181 (3)   | 4679.6 (8)  | 7258.7 (15) | 27.5 (5)       |
| C4   | 5656 (3)   | 5010.4 (8)  | 7759.5 (17) | 32.7 (6)       |
| C5   | 5588 (3)   | 5446.5 (9)  | 7480.0 (16) | 33.2 (6)       |
| C6   | 6067 (3)   | 5552.7 (8)  | 6705.4 (16) | 28.3 (5)       |
| C7   | 6645 (3)   | 5225.6 (7)  | 6177.9 (14) | 24.2 (5)       |
| C8   | 7160 (3)   | 5334.7 (7)  | 5354.6 (14) | 23.3 (5)       |
| C9   | 7252 (3)   | 5772.4 (8)  | 5066.4 (16) | 26.5 (5)       |
| C10  | 7742 (3)   | 5867.7 (8)  | 4298.1 (16) | 28.3 (5)       |
| C11  | 8186 (3)   | 5528.2 (8)  | 3772.2 (16) | 27.9 (5)       |
| C12  | 8128 (3)   | 5096.7 (8)  | 4027.1 (15) | 24.3 (5)       |
| C13  | 7614 (3)   | 4995.7 (7)  | 4811.1 (14) | 21.9 (5)       |
| C14  | 7543 (3)   | 4552.6 (7)  | 5118.1 (13) | 20.6 (5)       |
| C15  | 7682 (3)   | 3825.9 (7)  | 5262.5 (13) | 21.6 (5)       |

|     |          |            |             |          |
|-----|----------|------------|-------------|----------|
| C16 | 7976 (3) | 3357.7 (7) | 5089.4 (13) | 20.9 (5) |
| C17 | 9470 (3) | 3249.1 (7) | 4692.1 (14) | 23.7 (5) |
| C18 | 9901 (3) | 2814.6 (8) | 4557.0 (14) | 23.8 (5) |
| C19 | 8863 (3) | 2470.6 (7) | 4815.4 (13) | 21.5 (5) |
| C20 | 9302 (3) | 2013.5 (8) | 4697.8 (14) | 26.0 (5) |
| C21 | 8265 (3) | 1686.3 (8) | 4939.0 (15) | 30.3 (5) |
| C22 | 6681 (3) | 1778.1 (7) | 5319.2 (14) | 26.9 (5) |
| C23 | 5591 (4) | 1442.3 (9) | 5576.3 (16) | 34.1 (6) |
| C24 | 4052 (4) | 1540.7 (8) | 5925.5 (16) | 35.3 (6) |
| C25 | 3538 (3) | 1973.4 (8) | 6030.2 (15) | 28.7 (5) |
| C26 | 4589 (3) | 2324.0 (7) | 5784.7 (13) | 22.8 (5) |
| C27 | 4111 (3) | 2777.2 (7) | 5872.2 (13) | 23.2 (5) |
| C28 | 5158 (3) | 3108.6 (8) | 5653.5 (14) | 22.8 (5) |
| C29 | 6824 (3) | 3022.5 (7) | 5319.4 (13) | 20.2 (5) |
| C30 | 7293 (3) | 2573.3 (7) | 5186.7 (13) | 19.8 (5) |
| C31 | 6183 (3) | 2226.0 (7) | 5432.7 (13) | 21.4 (5) |

**Table S7 Anisotropic Displacement Parameters ( $\text{\AA}^2 \times 10^3$ ) for  $\text{M3}^+ \text{-PA}^-$ . The Anisotropic displacement factor exponent takes the form:  $-2\pi^2[\text{h}^2\text{a}^*2\text{U}_{11}+2\text{hka}^*\text{b}^*\text{U}_{12}+\dots]$ .**

| Atom | $\text{U}_{11}$ | $\text{U}_{22}$ | $\text{U}_{33}$ | $\text{U}_{12}$ | $\text{U}_{13}$ | $\text{U}_{23}$ |
|------|-----------------|-----------------|-----------------|-----------------|-----------------|-----------------|
| S1   | 28.6 (3)        | 34.1 (3)        | 27.5 (3)        | -1.0 (3)        | 8.7 (2)         | -1.9 (3)        |
| O8   | 33.4 (9)        | 32.3 (9)        | 25.2 (9)        | -0.7 (7)        | 9.7 (7)         | -1.5 (7)        |
| C38  | 46.5 (19)       | 55 (2)          | 43.4 (19)       | 0.4 (16)        | 9.2 (15)        | 19.8 (15)       |
| C39  | 36.6 (16)       | 54 (2)          | 44.4 (19)       | 1.6 (14)        | 10.3 (13)       | -20.5 (15)      |
| O1   | 50.0 (11)       | 28.0 (9)        | 33.2 (10)       | -3.6 (8)        | 15.2 (8)        | 4.5 (7)         |
| O2   | 38.1 (11)       | 47.6 (12)       | 66.5 (14)       | -8.4 (9)        | 18.9 (10)       | 9.2 (10)        |
| O3   | 41.5 (12)       | 45.6 (12)       | 83.9 (16)       | 11.0 (10)       | 30.2 (11)       | 10.3 (11)       |
| O4   | 48.5 (11)       | 26.1 (9)        | 49.0 (11)       | 4.7 (8)         | 13.8 (9)        | 3.3 (8)         |
| O5   | 35.3 (10)       | 34.9 (10)       | 43.6 (11)       | -5.8 (8)        | 12.0 (8)        | 5.6 (8)         |
| O6   | 32.5 (18)       | 17.2 (16)       | 41 (2)          | 8.5 (13)        | 10.2 (15)       | 21.0 (15)       |
| O6a  | 104 (4)         | 41 (3)          | 136 (5)         | -4 (3)          | 78 (4)          | -7 (3)          |
| O7   | 77.2 (16)       | 44.5 (12)       | 84.4 (17)       | 17.7 (11)       | 56.5 (14)       | 12.0 (11)       |
| N3   | 29.8 (11)       | 39.1 (13)       | 26.9 (11)       | -4.5 (10)       | 5.4 (9)         | 2.1 (9)         |
| N4   | 34.0 (11)       | 27.7 (11)       | 26.3 (11)       | -1.5 (9)        | 3.0 (9)         | 3.6 (8)         |
| N5   | 45.0 (14)       | 29.7 (13)       | 97 (2)          | 2.3 (11)        | 34.6 (14)       | 7.0 (13)        |
| C32  | 32.0 (13)       | 29.5 (13)       | 18.4 (12)       | -3.6 (10)       | 1.7 (9)         | 3.2 (9)         |
| C33  | 24.7 (12)       | 32.3 (13)       | 19.7 (12)       | -1.5 (10)       | 3.8 (9)         | 2.8 (10)        |
| C34  | 27.3 (12)       | 28.7 (13)       | 19.0 (12)       | 1.8 (10)        | -1.2 (9)        | -0.2 (9)        |
| C35  | 27.4 (12)       | 24.6 (12)       | 19.8 (12)       | -0.7 (10)       | 0.7 (9)         | 3.8 (9)         |
| C36  | 25.3 (13)       | 30.3 (13)       | 27.5 (13)       | -2.2 (10)       | 5.0 (10)        | 2.4 (10)        |



|     |           |           |           |            |           |            |
|-----|-----------|-----------|-----------|------------|-----------|------------|
| C37 | 28.8 (13) | 26.6 (13) | 36.1 (14) | 3.5 (10)   | 6.9 (10)  | 2.9 (10)   |
| N1  | 24.1 (10) | 18.0 (9)  | 25.8 (10) | -0.1 (8)   | 8.4 (8)   | 0.7 (8)    |
| N2  | 23.1 (10) | 19.7 (10) | 23.9 (11) | 0.1 (8)    | 6.9 (8)   | -0.3 (8)   |
| C1  | 17.3 (11) | 19.5 (11) | 27.0 (12) | -1.8 (9)   | 4.7 (9)   | 0.2 (9)    |
| C2  | 19.2 (11) | 24.5 (12) | 25.9 (12) | -1.9 (9)   | 4.3 (9)   | -4.5 (9)   |
| C3  | 25.4 (12) | 29.5 (13) | 29.3 (13) | -1.8 (10)  | 9.3 (10)  | -3.7 (10)  |
| C4  | 30.4 (13) | 35.2 (14) | 34.9 (15) | -3.8 (11)  | 12.7 (11) | -6.3 (11)  |
| C5  | 25.0 (12) | 35.4 (14) | 40.6 (15) | 1.0 (11)   | 9.9 (11)  | -14.7 (12) |
| C6  | 21.2 (12) | 25.2 (13) | 37.9 (14) | -0.1 (10)  | 2.1 (10)  | -5.9 (11)  |
| C7  | 16.1 (11) | 24.4 (12) | 31.9 (13) | -1.9 (9)   | 3.0 (9)   | -3.5 (10)  |
| C8  | 17.2 (11) | 21.2 (11) | 31.3 (13) | -1.2 (9)   | 2.6 (9)   | -2.8 (9)   |
| C9  | 21.6 (12) | 20.2 (12) | 37.4 (14) | 1.2 (9)    | 3.5 (10)  | -3.4 (10)  |
| C10 | 23.2 (12) | 20.3 (12) | 40.4 (15) | -0.1 (10)  | 0.9 (10)  | 6.1 (10)   |
| C11 | 22.9 (12) | 29.5 (13) | 31.5 (14) | -0.9 (10)  | 4.5 (10)  | 6.5 (10)   |
| C12 | 23.8 (12) | 21.4 (12) | 27.9 (13) | -0.2 (9)   | 4.2 (9)   | 0.4 (10)   |
| C13 | 15.4 (10) | 21.0 (11) | 28.5 (12) | -1.1 (9)   | 0.8 (9)   | 0.1 (9)    |
| C14 | 17.8 (11) | 18.9 (11) | 25.4 (12) | -1.5 (9)   | 3.9 (9)   | -0.6 (9)   |
| C15 | 21.3 (11) | 20.5 (11) | 24.1 (12) | -0.5 (9)   | 6.7 (9)   | 1.1 (9)    |
| C16 | 22.3 (11) | 19.7 (11) | 20.9 (11) | 1.6 (9)    | 3.5 (9)   | 1.2 (9)    |
| C17 | 22.2 (11) | 24.3 (12) | 25.5 (12) | -1.2 (10)  | 6.7 (9)   | -0.1 (9)   |
| C18 | 19.9 (11) | 31.1 (13) | 21.2 (12) | 2.3 (10)   | 5.3 (9)   | -2.3 (9)   |
| C19 | 21.8 (11) | 23.1 (11) | 19.0 (11) | 2.1 (9)    | 0.7 (9)   | 0.6 (9)    |
| C20 | 27.4 (12) | 27.9 (13) | 23.1 (12) | 4.4 (10)   | 4.7 (10)  | -1.5 (10)  |
| C21 | 38.3 (14) | 22.0 (12) | 30.4 (14) | 4.5 (11)   | 4.0 (11)  | 0.3 (10)   |
| C22 | 32.7 (13) | 23.2 (12) | 24.1 (12) | -0.6 (10)  | 1.4 (10)  | 1.0 (9)    |
| C23 | 43.1 (15) | 22.5 (13) | 36.5 (15) | -2.9 (11)  | 5.0 (12)  | 3.6 (11)   |
| C24 | 42.7 (15) | 27.2 (13) | 36.8 (15) | -10.4 (12) | 8.6 (12)  | 6.0 (11)   |
| C25 | 28.4 (13) | 32.6 (13) | 25.6 (13) | -6.4 (10)  | 5.7 (10)  | 2.0 (10)   |
| C26 | 21.2 (11) | 28.1 (12) | 17.8 (11) | -3.2 (9)   | -1.3 (9)  | 2.3 (9)    |
| C27 | 19.6 (11) | 29.7 (12) | 20.7 (12) | -0.0 (10)  | 4.1 (9)   | 0.7 (9)    |
| C28 | 22.2 (11) | 22.2 (12) | 23.9 (12) | 2.9 (9)    | 2.5 (9)   | -0.6 (9)   |
| C29 | 21.3 (11) | 21.7 (11) | 17.2 (11) | -0.5 (9)   | 1.9 (8)   | -0.2 (8)   |
| C30 | 21.1 (11) | 21.5 (11) | 16.2 (11) | 1.9 (9)    | 0.6 (8)   | 0.8 (9)    |
| C31 | 23.3 (11) | 22.0 (11) | 17.9 (11) | -1.4 (9)   | -0.8 (9)  | 1.9 (9)    |

**Table S8 Bond Lengths for M3<sup>+</sup>-PA<sup>-</sup>.**

| <b>Atom</b> | <b>Atom</b> | <b>Length/Å</b> | <b>Atom</b> | <b>Atom</b> | <b>Length/Å</b> |
|-------------|-------------|-----------------|-------------|-------------|-----------------|
| S1          | O8          | 1.5040 (17)     | C5          | C6          | 1.382 (4)       |
| S1          | C38         | 1.787 (3)       | C6          | C7          | 1.410 (3)       |
| S1          | C39         | 1.776 (3)       | C7          | C8          | 1.467 (3)       |
| O1          | C32         | 1.248 (3)       | C8          | C9          | 1.407 (3)       |
| O2          | N3          | 1.225 (3)       | C8          | C13         | 1.419 (3)       |
| O3          | N3          | 1.227 (3)       | C9          | C10         | 1.368 (3)       |
| O4          | N4          | 1.229 (2)       | C10         | C11         | 1.399 (3)       |
| O5          | N4          | 1.235 (2)       | C11         | C12         | 1.370 (3)       |
| O6          | O6a         | 1.416 (7)       | C12         | C13         | 1.403 (3)       |
| O6          | N5          | 1.322 (4)       | C13         | C14         | 1.431 (3)       |
| O6a         | N5          | 1.326 (5)       | C15         | C16         | 1.465 (3)       |
| O7          | N5          | 1.176 (3)       | C16         | C17         | 1.399 (3)       |
| N3          | C33         | 1.455 (3)       | C16         | C29         | 1.411 (3)       |
| N4          | C35         | 1.448 (3)       | C17         | C18         | 1.377 (3)       |
| N5          | C37         | 1.458 (3)       | C18         | C19         | 1.394 (3)       |
| C32         | C33         | 1.453 (3)       | C19         | C20         | 1.439 (3)       |
| C32         | C37         | 1.447 (3)       | C19         | C30         | 1.421 (3)       |
| C33         | C34         | 1.377 (3)       | C20         | C21         | 1.346 (3)       |
| C34         | C35         | 1.378 (3)       | C21         | C22         | 1.430 (3)       |
| C35         | C36         | 1.383 (3)       | C22         | C23         | 1.398 (3)       |
| C36         | C37         | 1.362 (3)       | C22         | C31         | 1.423 (3)       |
| N1          | C1          | 1.383 (3)       | C23         | C24         | 1.378 (4)       |
| N1          | C15         | 1.347 (3)       | C24         | C25         | 1.380 (4)       |
| N2          | C14         | 1.383 (3)       | C25         | C26         | 1.407 (3)       |
| N2          | C15         | 1.331 (3)       | C26         | C27         | 1.428 (3)       |
| C1          | C2          | 1.432 (3)       | C26         | C31         | 1.416 (3)       |
| C1          | C14         | 1.368 (3)       | C27         | C28         | 1.347 (3)       |
| C2          | C3          | 1.402 (3)       | C28         | C29         | 1.443 (3)       |
| C2          | C7          | 1.423 (3)       | C29         | C30         | 1.426 (3)       |
| C3          | C4          | 1.376 (3)       | C30         | C31         | 1.426 (3)       |
| C4          | C5          | 1.392 (4)       |             |             |                 |

**Table S9 Bond Angles for M3<sup>+</sup>-PA<sup>-</sup>.**

| Atom | Atom | Atom | Angle/°     | Atom | Atom | Atom | Angle/°     |
|------|------|------|-------------|------|------|------|-------------|
| C38  | S1   | O8   | 104.17 (14) | C9   | C8   | C7   | 122.7 (2)   |
| C39  | S1   | O8   | 104.71 (13) | C13  | C8   | C7   | 120.62 (19) |
| C39  | S1   | C38  | 98.79 (17)  | C13  | C8   | C9   | 116.7 (2)   |
| N5   | O6   | O6a  | 57.8 (2)    | C10  | C9   | C8   | 121.8 (2)   |
| N5   | O6a  | O6   | 57.5 (3)    | C11  | C10  | C9   | 120.5 (2)   |
| O3   | N3   | O2   | 121.9 (2)   | C12  | C11  | C10  | 119.8 (2)   |
| C33  | N3   | O2   | 119.8 (2)   | C13  | C12  | C11  | 120.0 (2)   |
| C33  | N3   | O3   | 118.3 (2)   | C12  | C13  | C8   | 121.1 (2)   |
| O5   | N4   | O4   | 122.91 (19) | C14  | C13  | C8   | 116.1 (2)   |
| C35  | N4   | O4   | 118.5 (2)   | C14  | C13  | C12  | 122.8 (2)   |
| C35  | N4   | O5   | 118.62 (19) | C1   | C14  | N2   | 106.88 (18) |
| O6a  | N5   | O6   | 64.6 (3)    | C13  | C14  | N2   | 129.7 (2)   |
| O7   | N5   | O6   | 120.4 (3)   | C13  | C14  | C1   | 123.4 (2)   |
| O7   | N5   | O6a  | 107.4 (3)   | N2   | C15  | N1   | 108.61 (19) |
| C37  | N5   | O6   | 114.1 (3)   | C16  | C15  | N1   | 126.40 (19) |
| C37  | N5   | O6a  | 116.9 (3)   | C16  | C15  | N2   | 124.95 (19) |
| C37  | N5   | O7   | 120.2 (2)   | C17  | C16  | C15  | 117.64 (19) |
| C33  | C32  | O1   | 125.5 (2)   | C29  | C16  | C15  | 122.11 (19) |
| C37  | C32  | O1   | 122.9 (2)   | C29  | C16  | C17  | 120.3 (2)   |
| C37  | C32  | C33  | 111.6 (2)   | C18  | C17  | C16  | 121.0 (2)   |
| C32  | C33  | N3   | 120.2 (2)   | C19  | C18  | C17  | 120.9 (2)   |
| C34  | C33  | N3   | 116.3 (2)   | C20  | C19  | C18  | 122.1 (2)   |
| C34  | C33  | C32  | 123.5 (2)   | C30  | C19  | C18  | 119.09 (19) |
| C35  | C34  | C33  | 119.7 (2)   | C30  | C19  | C20  | 118.8 (2)   |
| C34  | C35  | N4   | 119.7 (2)   | C21  | C20  | C19  | 121.2 (2)   |
| C36  | C35  | N4   | 119.2 (2)   | C22  | C21  | C20  | 121.5 (2)   |
| C36  | C35  | C34  | 121.1 (2)   | C23  | C22  | C21  | 122.2 (2)   |
| C37  | C36  | C35  | 119.0 (2)   | C31  | C22  | C21  | 119.0 (2)   |
| C32  | C37  | N5   | 119.1 (2)   | C31  | C22  | C23  | 118.7 (2)   |
| C36  | C37  | N5   | 115.9 (2)   | C24  | C23  | C22  | 121.0 (2)   |
| C36  | C37  | C32  | 125.0 (2)   | C25  | C24  | C23  | 121.0 (2)   |
| C15  | N1   | C1   | 108.44 (18) | C26  | C25  | C24  | 120.3 (2)   |
| C15  | N2   | C14  | 109.01 (19) | C27  | C26  | C25  | 122.6 (2)   |
| C2   | C1   | N1   | 130.4 (2)   | C31  | C26  | C25  | 119.0 (2)   |
| C14  | C1   | N1   | 107.06 (18) | C31  | C26  | C27  | 118.4 (2)   |
| C14  | C1   | C2   | 122.5 (2)   | C28  | C27  | C26  | 121.8 (2)   |
| C3   | C2   | C1   | 123.1 (2)   | C29  | C28  | C27  | 121.5 (2)   |
| C7   | C2   | C1   | 116.05 (19) | C28  | C29  | C16  | 123.67 (19) |
| C7   | C2   | C3   | 120.8 (2)   | C30  | C29  | C16  | 118.31 (19) |

|    |    |    |           |     |     |     |             |
|----|----|----|-----------|-----|-----|-----|-------------|
| C4 | C3 | C2 | 120.2 (2) | C30 | C29 | C28 | 117.98 (19) |
| C5 | C4 | C3 | 120.0 (2) | C29 | C30 | C19 | 120.33 (19) |
| C6 | C5 | C4 | 120.6 (2) | C31 | C30 | C19 | 119.94 (19) |
| C7 | C6 | C5 | 121.3 (2) | C31 | C30 | C29 | 119.74 (19) |
| C6 | C7 | C2 | 117.0 (2) | C26 | C31 | C22 | 119.9 (2)   |
| C8 | C7 | C2 | 121.2 (2) | C30 | C31 | C22 | 119.6 (2)   |
| C8 | C7 | C6 | 121.8 (2) | C30 | C31 | C26 | 120.51 (19) |

**Table S10 Hydrogen Atom Coordinates ( $\text{\AA}\times 10^4$ ) and Isotropic Displacement Parameters ( $\text{\AA}^2\times 10^3$ ) for  $\text{M3}^+\text{-PA}^-$ .**

| Atom | X          | y         | z         | U(eq)   |
|------|------------|-----------|-----------|---------|
| H38b | 10550 (40) | 4598 (9)  | 2128 (18) | 53 (9)  |
| H39b | 10230 (40) | 3393 (11) | 2337 (19) | 58 (10) |
| H39c | 10090 (40) | 3653 (10) | 1480 (20) | 61 (10) |
| H38a | 8330 (50)  | 4754 (13) | 2010 (20) | 92 (13) |
| H38c | 9190 (40)  | 4456 (10) | 1350 (20) | 63 (10) |
| H39a | 11570 (40) | 3804 (9)  | 2274 (16) | 39 (7)  |
| H34  | 7870 (30)  | 2125 (8)  | 7638 (14) | 25 (6)  |
| H36  | 3500 (40)  | 2647 (8)  | 8477 (16) | 38 (7)  |
| H1   | 7170 (40)  | 3821 (9)  | 6486 (17) | 44 (8)  |
| H2   | 8180 (30)  | 4119 (8)  | 4246 (16) | 29 (7)  |
| H3   | 6210 (30)  | 4359 (8)  | 7453 (14) | 30 (6)  |
| H4   | 5410 (40)  | 4934 (9)  | 8282 (17) | 39 (7)  |
| H5   | 5160 (30)  | 5672 (8)  | 7824 (16) | 36 (7)  |
| H6   | 6060 (30)  | 5857 (8)  | 6501 (14) | 23 (6)  |
| H9   | 7010 (40)  | 6003 (9)  | 5391 (17) | 41 (8)  |
| H10  | 7760 (30)  | 6162 (7)  | 4120 (13) | 16 (5)  |
| H11  | 8540 (30)  | 5589 (8)  | 3246 (15) | 28 (6)  |
| H12  | 8430 (30)  | 4883 (8)  | 3689 (14) | 22 (6)  |
| H17  | 10230 (30) | 3496 (8)  | 4531 (14) | 23 (6)  |
| H18  | 10910 (30) | 2749 (8)  | 4292 (15) | 29 (6)  |
| H20  | 10280 (30) | 1961 (8)  | 4440 (15) | 30 (7)  |
| H21  | 8560 (40)  | 1380 (10) | 4885 (17) | 47 (8)  |
| H24  | 3380 (40)  | 1316 (9)  | 6123 (16) | 41 (7)  |
| H23  | 5910 (30)  | 1168 (9)  | 5530 (16) | 35 (7)  |
| H25  | 2440 (30)  | 2056 (8)  | 6289 (15) | 30 (6)  |
| H27  | 3010 (30)  | 2842 (8)  | 6070 (14) | 28 (6)  |
| H28  | 4830 (30)  | 3407 (8)  | 5727 (14) | 24 (6)  |

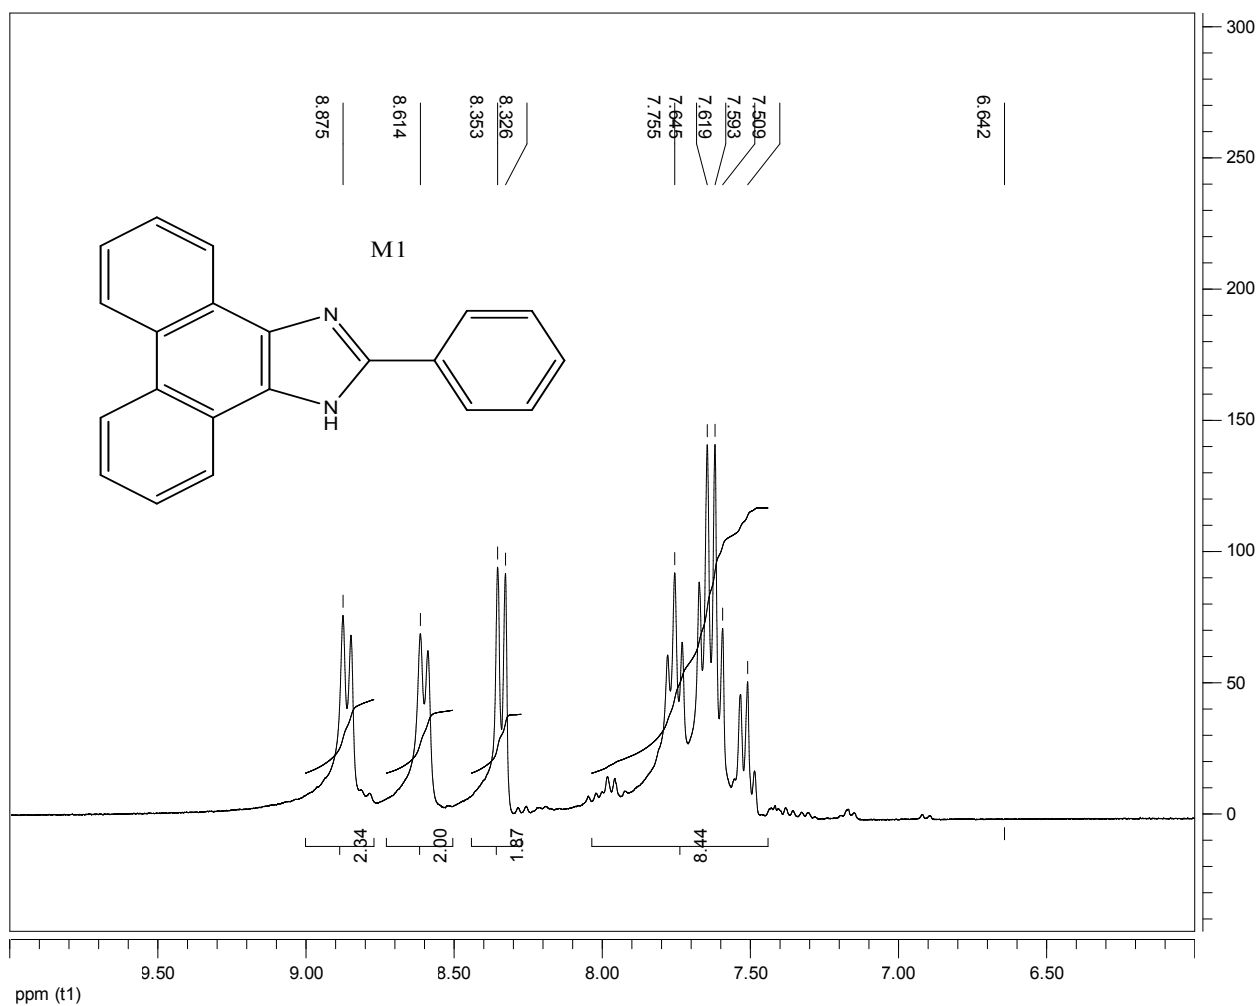

H NMR (CDCl<sub>3</sub>-d<sub>3</sub>) 300MHz  $\delta$ : 8.862(d, J=8.1Hz, 2H) , 8.601(d, J=7.7Hz, 2H), 8.34(d, J=8Hz, 2H), 7.758-7.619(m, 4H), 7.509(m, 4H),

**Figure S1.** <sup>1</sup>H NMR spectrum of M1.

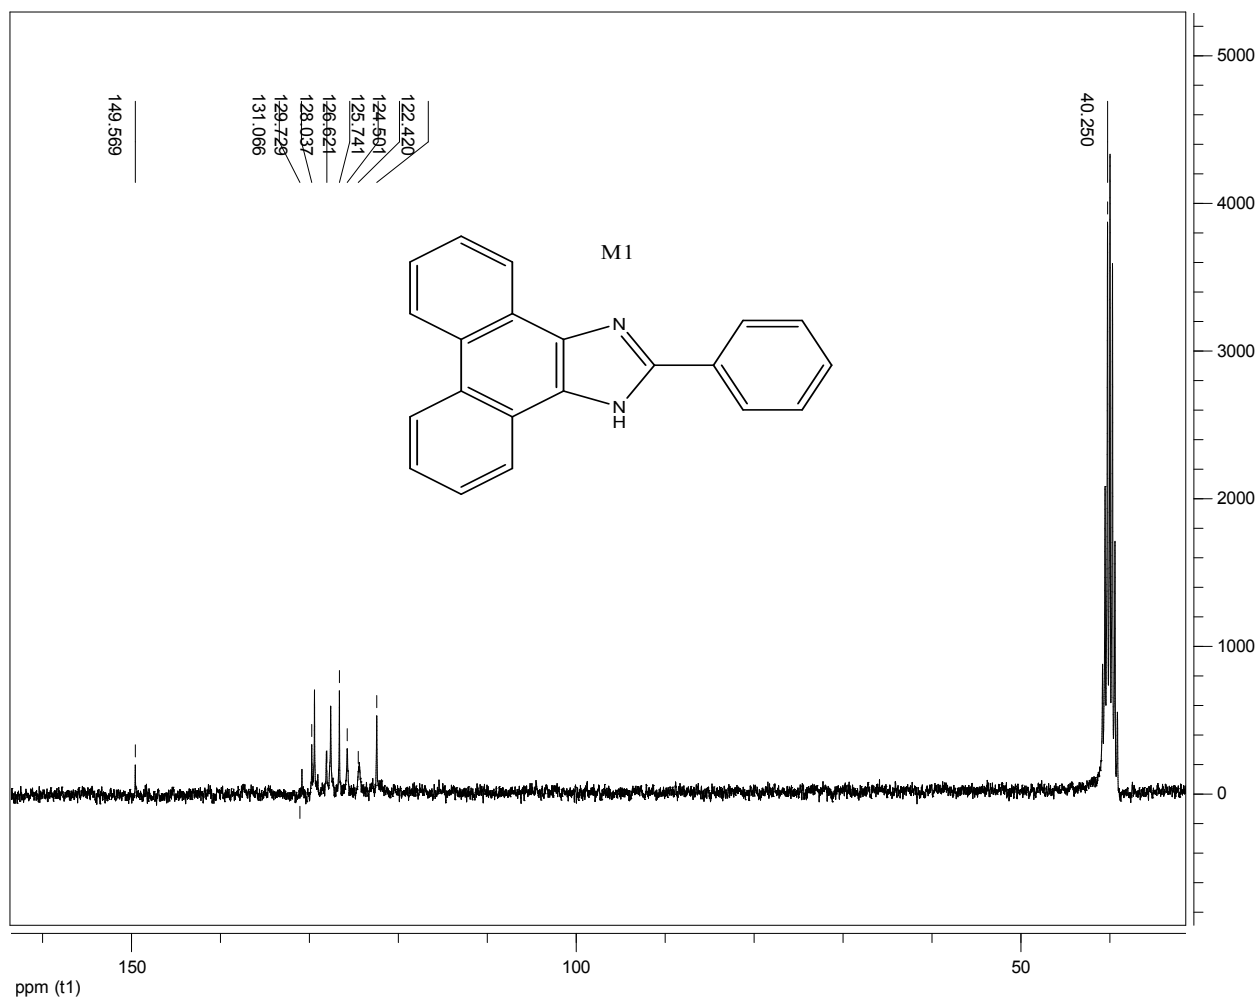

$^{13}\text{C}$  NMR(300 MHz,  $\text{CDCl}_3$ ) (ppm)  $\square$ C: 149.588 , 131.066, 129.729 , 128.037 , 126.621 , 125.741 , 124.501 , 122.420 , 40.250

**Figure S2.**  $^{13}\text{C}$  NMR spectrum of M1.

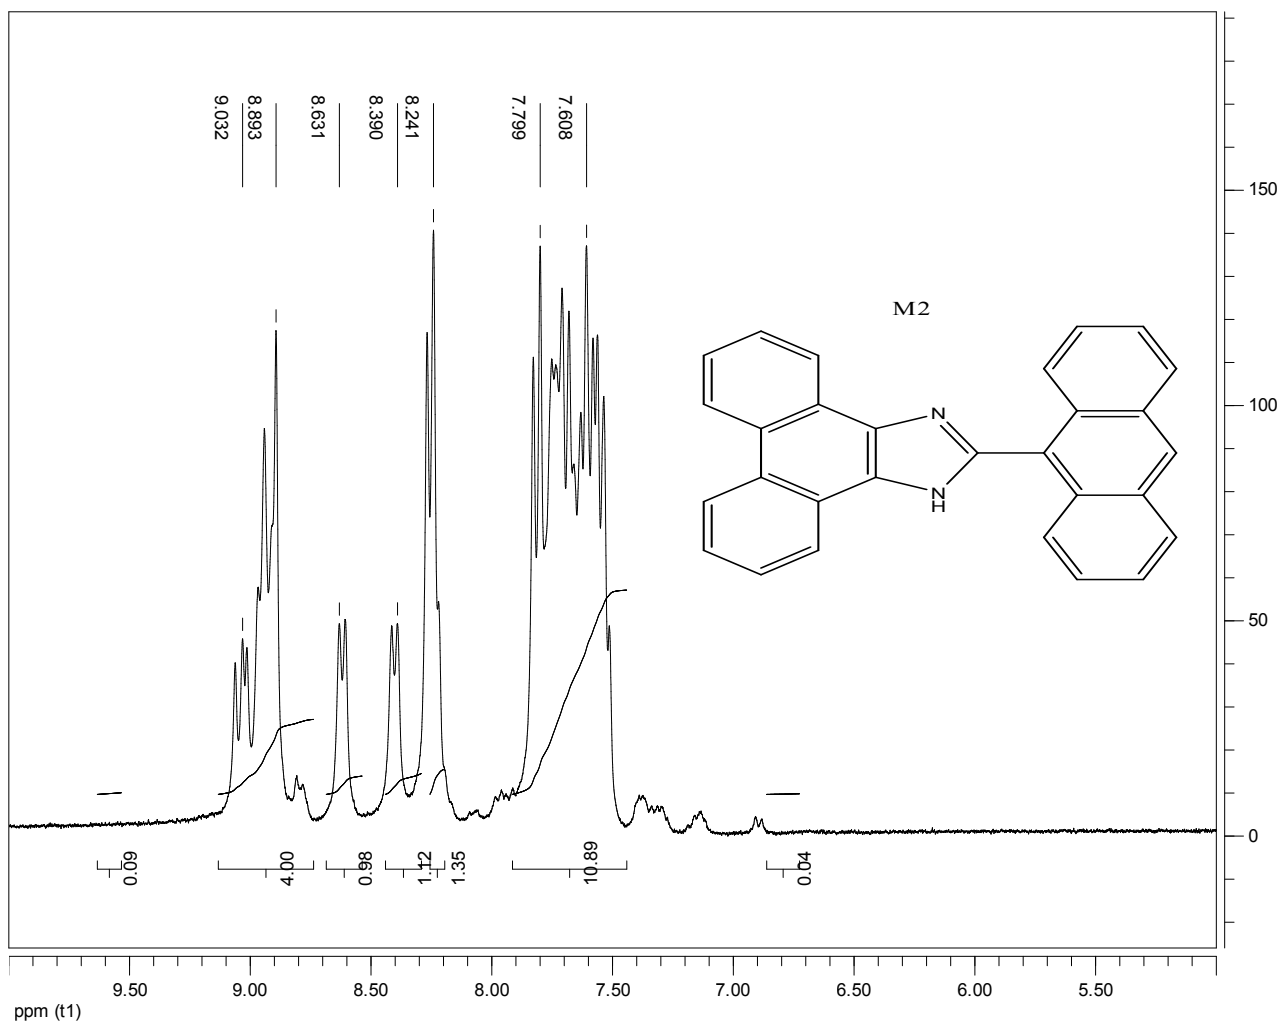

$^1\text{H}$  NMR ( $\text{CDCl}_3\text{-d}_3$ ) 300MHz  $\delta$ : 9.063(s, 1H), 9.032(d,  $J=5.4\text{Hz}$ , 1H), 8.942(m, 2H), 8.631(d,  $j=7.2\text{Hz}$ , 1H) 8.241(m, 1H), 7.799-7.514(m, 12H).

**Figure S3.**  $^1\text{H}$  NMR spectrum of M2.

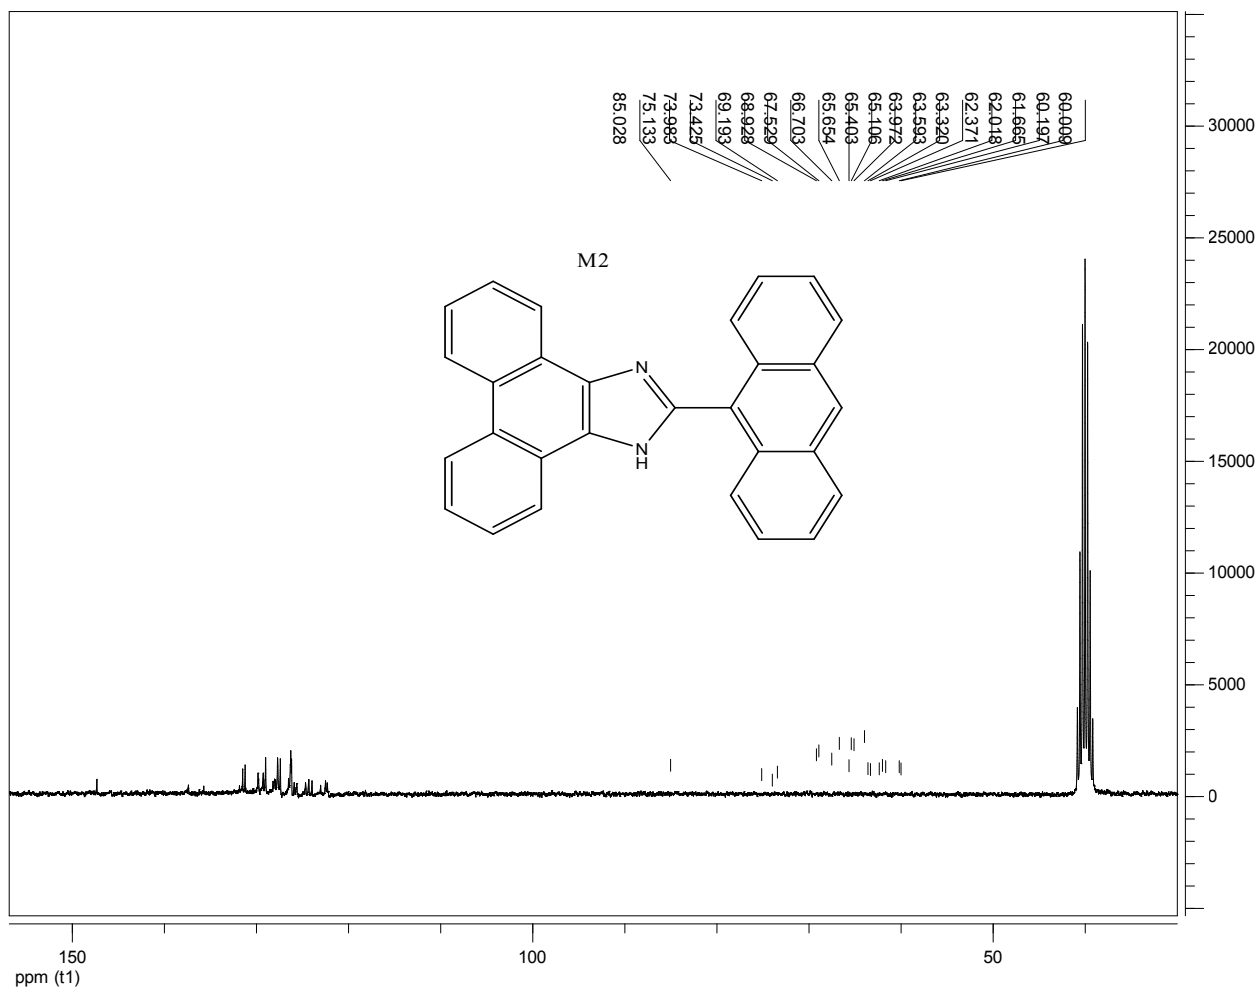

$^{13}\text{C}$  NMR(300 MHz,  $\text{CDCl}_3$ ) (ppm)  $\square$ C: 147.329 , 137.435 , 136.284 , 135.726 , 131.495 , 131.230 , 129.831 , 129.005 , 127.956 , 127.705 , 127.407 , 126.274 , 125.895 , 125.621 , 124.672 , 124.320 , 123.967 , 122.499 , 122.310 , 40.018

**Figure S4.**  $^{13}\text{C}$  NMR spectrum of M2



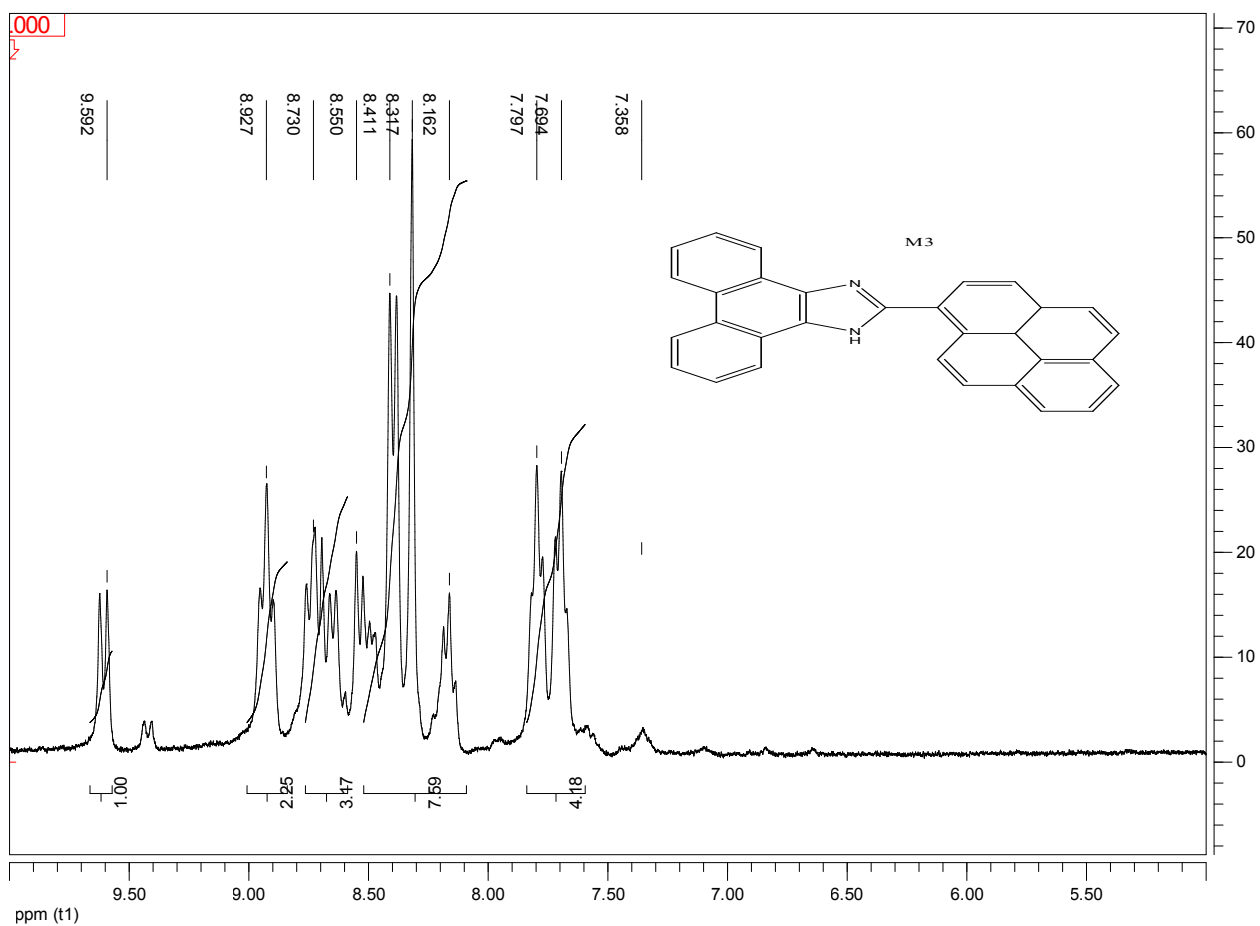

$^1\text{H NMR}$  ( $\text{CDCl}_3\text{-d}_3$ ) 300MHz  $\delta$ : 9.608(d,  $J=6.0\text{MHz}$ , 1H), 8.927(t,  $J=7.8\text{MHz}$ , 2H), 8.695-8.636(m, 7H), 8.536(d,  $J=8.4\text{MHz}$ , 1H), 8.396(d,  $J=7.1\text{MHz}$ , 1H), 8.162(t, 2H), 7.797(t,  $J=6.9\text{MHz}$ , 2H), 7.694(t,  $J=7.1\text{MHz}$ , 2H),

**Figure S5.**  $^1\text{H NMR}$  spectrum of M3

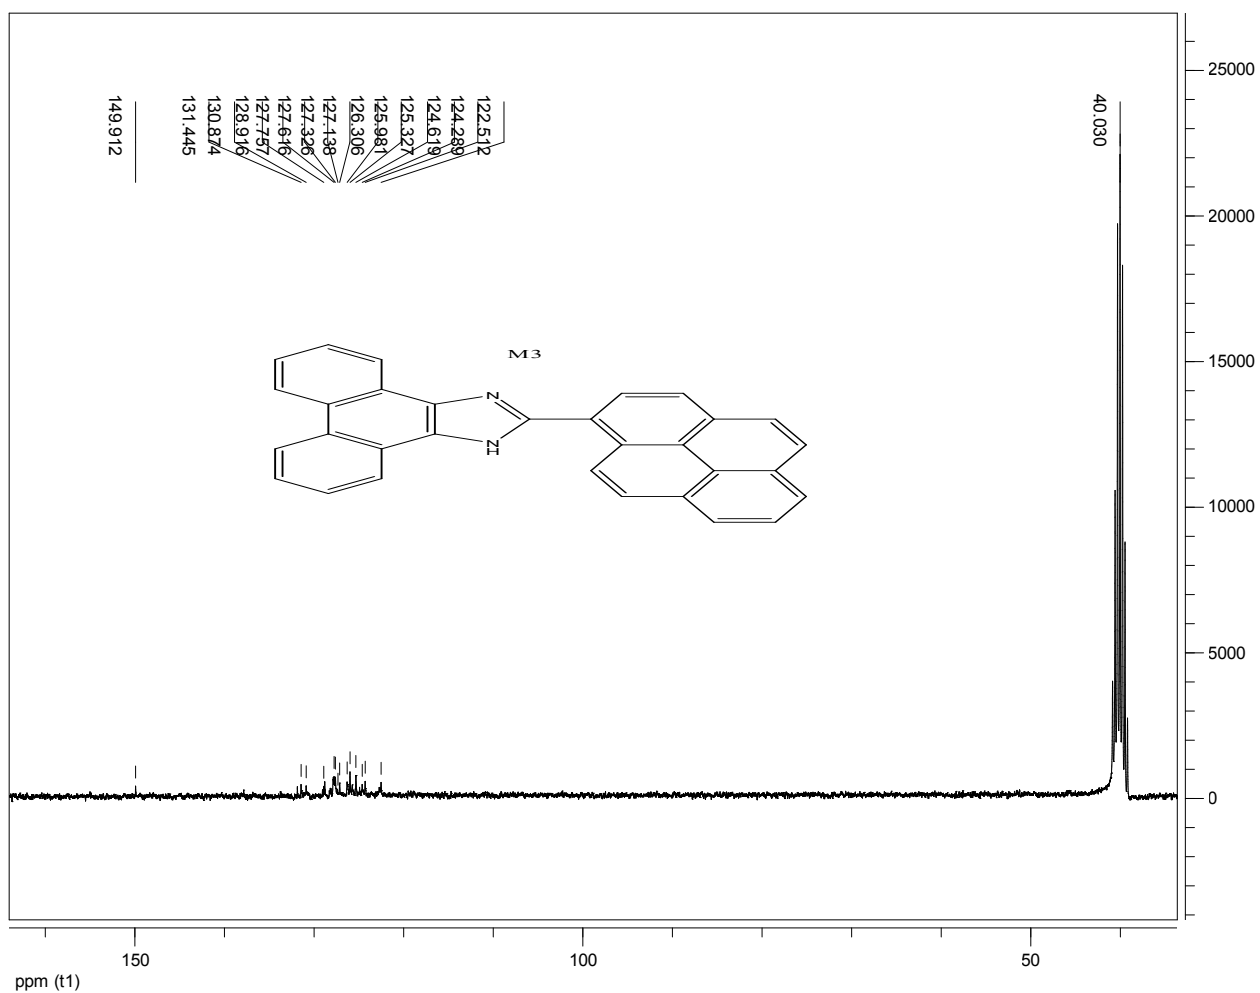

$^{13}\text{C}$  NMR(300 MHz,  $\text{CDCl}_3$ ) (ppm)  $\square$ C: 149.912 , 131.445 , 130.874 , 128.916 , 127.757 , 127.616 , 127.326 , 127.138 , 126.306 , 125.981 , 125.327 , 124.819 , 124.289 , 122.512 , 40.030

**Figure S6.**  $^{13}\text{C}$  NMR spectrum of M3.

### FTIR of M1,M2 and M3

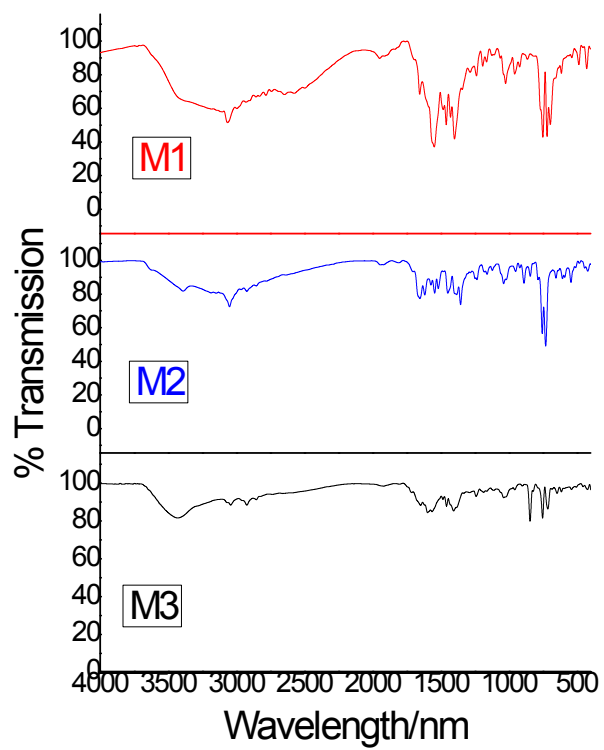

Figure S7. FTIR spectra of M1, M2 and M3.

## Topology of (M1<sup>+</sup>-PA<sup>-</sup>)

The analysis was performed with the ToposPro program package and the Topological Type Database (TTD) collection of periodic network topologies<sup>1</sup>. The nets are designated with the Topos NDn nomenclature<sup>2</sup>, where N is a sequence of coordination numbers of all non-equivalent nodes of the net, D is periodicity of the net (D=M, C, L, T for 0-,1-,2-,3-periodic nets), and ‘n’ is the ordinal number of the net in the set of all non-isomorphic nets with the given ND sequence. Connectivity of the atoms in the structures was determined by means of the “Domains” method implemented in Auto CN program<sup>3</sup>.

The structure comprises hydrogen-bonded chains consisting of 2-phenyl-3H-phenanthro[9,10-d]imidazol-1-ium cations (M1<sup>+</sup>) connected by means of the picrate anions and water molecules. Each of the two crystallographically inequivalent M1<sup>+</sup> cations forms hydrogen bonds with picrate anions (PA<sup>-</sup>), though only one of them is hydrogen-bonded to the water molecule (Figure S8).

The standard description<sup>2</sup> of a hydrogen-bonded crystal includes simplification procedure, i.e. representation of the molecular network in terms of a graph-theory approach, taking into account hydrogen bonds between molecules. The simplification procedure consists of representing the molecule by its center of mass, keeping the connectivity of the molecule with its neighbors; all intermolecular contacts between a given pair of molecules transform to the same edge between the molecular centers of mass in the simplified net (Figure. S9a). The subsequent secondary simplification of the net obtained at the previous step includes removing of the 0- and 1-coordinated nodes. Thus, this description characterizes the way molecules are hydrogen-bonded in crystal. The standard representation of the structure resulted in the underlying net of 2C1 topological type (Figure. S9b).

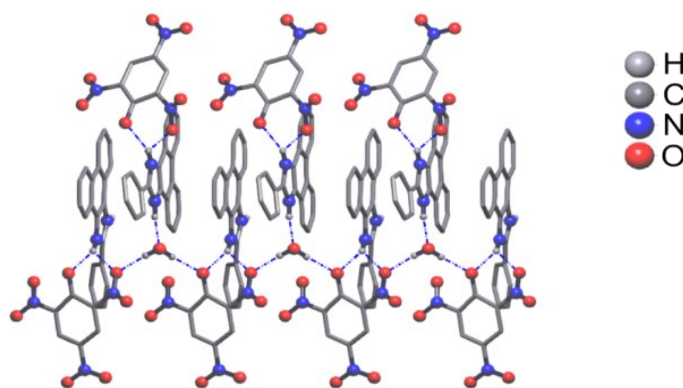

**Figure S8.** Fragment of the hydrogen-bonded chain running along *a* axis. Hydrogen atoms that do not participate in hydrogen-bonding are omitted for clarity.

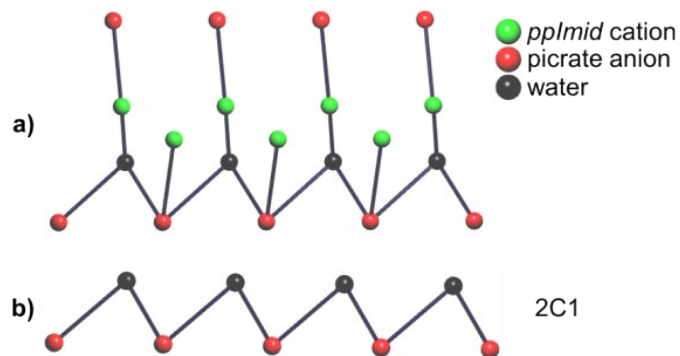

**Figure S9.** The standard representation of the hydrogen-bonded chain in the crystal. (a) The net obtained after primary simplification. (b) The underlying 1-periodic net of 2C1 topological type obtained after secondary simplification.

Taking into account all intermolecular contacts during the simplification procedure, one can obtain a description of the molecular packing. In the structure under investigation the hydrogen-bonded pair of  $M1^+$  cations and picrate anions, presumably, is the pair of molecular ions with the highest interaction energy both due to the hydrogen bond formed and due to their opposite charge. Therefore, this pair can be considered as a building unit of the crystal. Representation of the crystal structure as a packing of the hydrogen-bonded pairs leads to the uninodal 15-c packing net with point symbol  $3^{39}.4^{60}.5^6$  (Figure. S10).

In order to conduct the multilevel topological description<sup>4</sup> of the packing net of the hydrogen-bonded pairs ( $M1^+$  cations and picrate anions) we select the value of molecular solid angle ( $\Omega_i$ ) as a criterion, which will serve as a weight factor to be proportional to the strength of the intermolecular contact. Using the subroutine implemented in ToposPro, different subnets can be obtained from the underlying net that contains the edges of a weight no less than a specified value. Having applied the multilevel analysis, we obtain the following order of the subnets that describe the molecular packing of  $M1^+$  cation and picrate anion pairs on different levels of  $\Omega_i$  (Table 1).

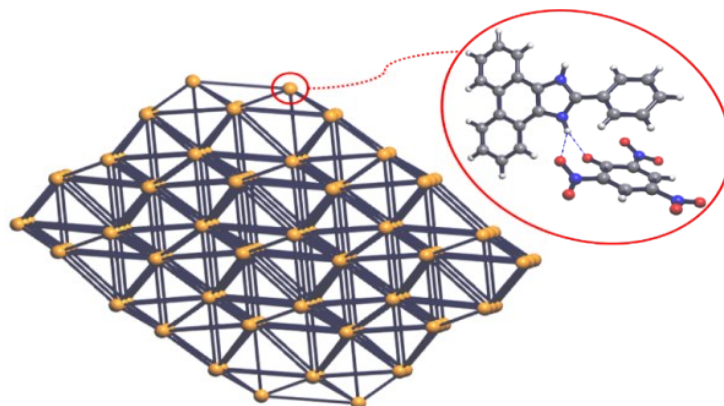

**Figure S10.** Underlying uninodal 15-c net of the molecular packing with unknown topological type (PS  $3^{39}.4^{60}.5^6$ ).

Table 1. The subnets that describe the molecular packing on different levels of  $\Omega_i$ . For each of the two crystallographically inequivalent pairs, the degrees of the nodes in the net are listed. For those nets that are unknown, the point of the net is shown.

**Table S11:** The subnets of  $M1^+-PA^-$

| Node degrees | $\Omega_i$ , % | Topological type                                |
|--------------|----------------|-------------------------------------------------|
| 0-c, 1-c     | 15.5           | 1M2-1                                           |
| 1-c, 2-c     | 14.5           | 1,2M4-1                                         |
| 2-c, 3-c     | 13.5           | 2,3C1                                           |
| 3-c, 3-c     | 12.5           | <b>Hcb</b>                                      |
| 3-c, 4-c     | 9.0            | <b>bbe-3,4-Cmmm</b>                             |
| 4-c, 5-c     | 7.0            | <b>stc-4,5-C2/c</b>                             |
| 7-c, 7-c     | 5.0            | $\{3^4.4^8.5^6.6^3\}\{3^5.4^{11}.5^5\}$         |
| 9-c, 11-c    | 4.0            | $\{3^{15}.4^{31}.5^9\}\{3^9.4^{17}.5^{10}\}$    |
| 11-c, 11-c   | 3.0            | $\{3^{14}.4^{30}.5^{11}\}\{3^{16}.4^{34}.5^5\}$ |
| 13-c, 13-c   | 2.0            | <b>bcu-x-13,13-Cmca</b>                         |
| 15-c, 15-c   | 1.0            | $3^{39}.4^{60}.5^6$                             |

## Topology of (M3<sup>+</sup>-PA<sup>-</sup>)

Analysis was performed with the ToposPro program package and the TTD collection of periodic network topologies<sup>1</sup>. The RCSR three-letter codes<sup>5</sup> were used to designate the network topologies. Those nets that are absent in the RCSR are designated with the Topos NDn nomenclature<sup>2</sup>, where N is a sequence of coordination numbers of all non-equivalent nodes of the net, D is periodicity of the net (D=M, C, L, T for 0-,1-,2-,3-periodic nets), and n is the ordinal number of the net in the set of all non-isomorphic nets with the given ND sequence.

Standard simplification procedure of the hydrogen-bonded structure resulted in the 1,2M3-1 molecular packing net, with 1-, 1- and 2-coordinated nodes corresponding to picric acid anion (PA), dimethylsulfoxide (DMSO) and 2-pyrenyl-1H-phenanthro [9,10-d]imidazolium cation (M3), respectively (Figure S11). Thus, PA, DMSO and M3 form hydrogen-bonded trimers.

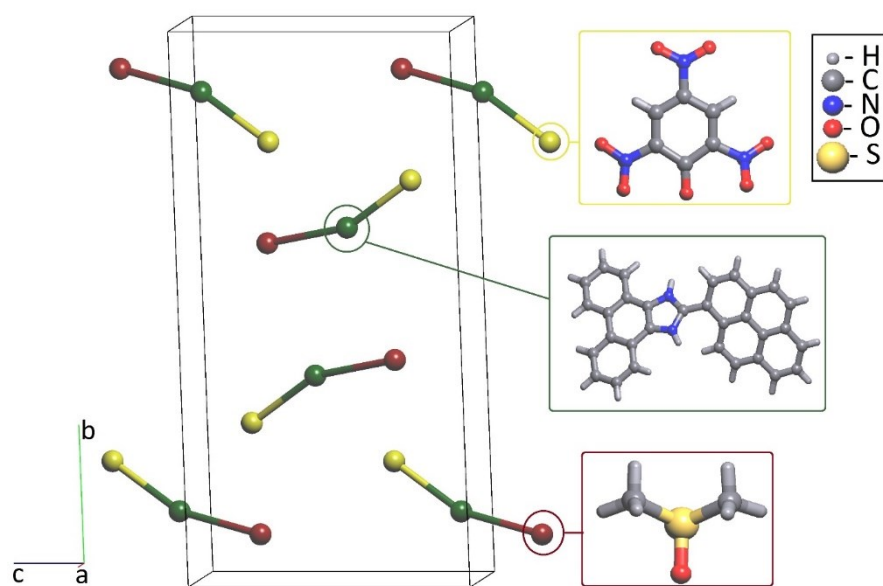

**Figure S11.** Underlying net of the structure. Yellow, green and red spheres correspond to PA, M3 and DMSO molecular centroids, respectively

In the packing of the hydrogen-bonded trimers, each trimer is surrounded by 14 other ones (Figure S12), forming 14T122 net.

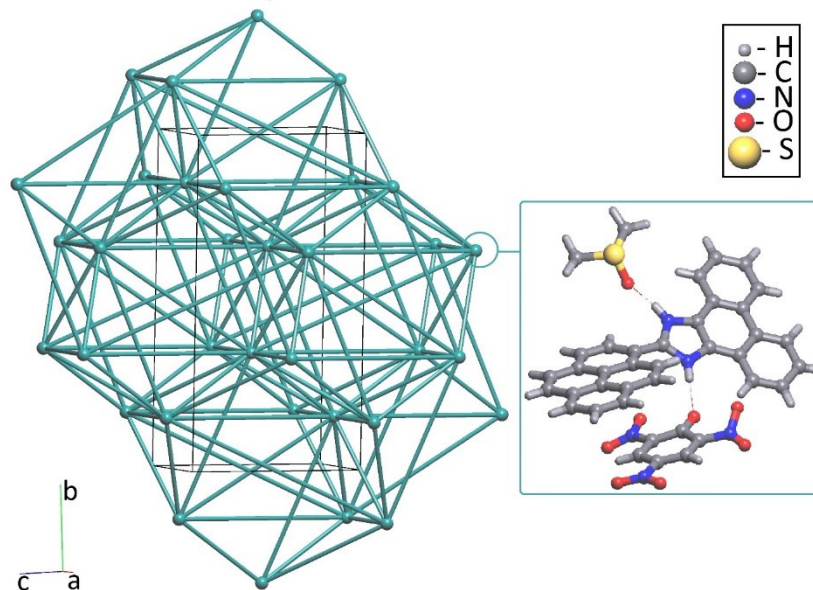

**Figure S12.** Underlying net of the hydrogen-bonded trimers packing. Cyan spheres correspond to the trimer centroids

**Figure S10.** Underlying uninodal 15-c net of the molecular packing with unknown topological type (PS 3<sup>39</sup>.4<sup>60</sup>.5<sup>6</sup>).

From Figure S12 it is seen, that PA anion and M3 cation are formed during proton transfer from hydroxyl of picric acid into nitrogen of 2-pyrenyl-1H-phenanthro [9,10-d]imidazole. However, hydrogen-bonded fragments form 0D net, so there is no infinite pathways for proton transport.

In order to conduct the multilevel topological description<sup>4</sup> of the molecular packing we select the value of molecular solid angle ( $\Omega_i$ ) as a criterion, which will serve as a weight factor to be proportional to the strength of the intermolecular contact. Using the subroutine Generate Representations implemented in ToposPro, different subnets can be obtained from the underlying net that contain the edges of a weight no less than a specified value (Figure S13). The 14-c molecular packing net describes the way the hydrogen-bonded trimers are assembled. Each subnet of this net contains information about the spatial arrangement of strong intermolecular contacts, assuming the  $\Omega_i$  is proportional to the strength of intermolecular interaction (Table 1).



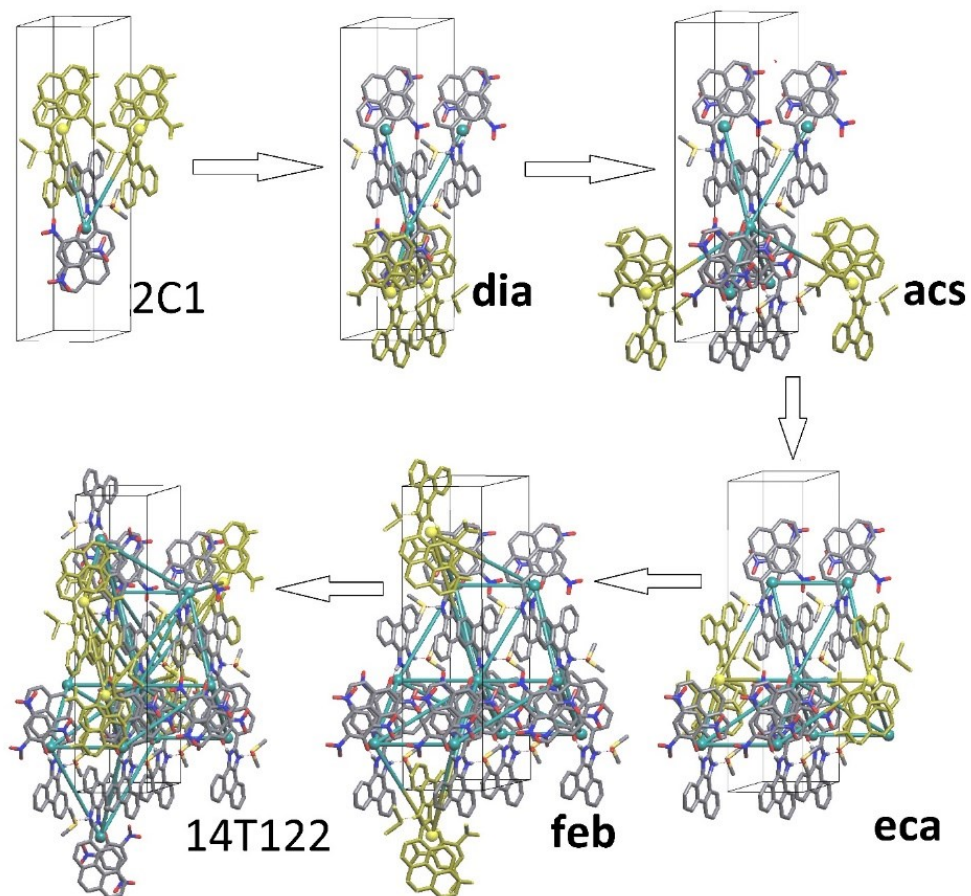

**Figure S13.** Subnets of the initial net corresponding to the molecular packing in structure at different levels: 2-c 2C1 → 4-c **dia** → 6-c **acs** → 8-c **eca** → 10-c **feb** → 14-c 14T122 net. Highlighted fragments correspond to the hydrogen-bonded trimers, which appear at a given  $\Omega$  value.

**Table S12:** Values of the molecular solid angle ( $\Omega_i$ ) and corresponding topological types of the subnets of the molecular packing net

| No. of molecules | $\Omega_i$ , % | Dimensionality | Topology   |
|------------------|----------------|----------------|------------|
| 1, 2             | 18             | 1D             | 2C1        |
| 3, 4             | 12             | 3D             | <b>Dia</b> |
| 5, 6             | 8              | 3D             | <b>Acs</b> |
| 7, 8             | 6              | 3D             | <b>Eca</b> |
| 9, 10            | 3              | 3D             | <b>Feb</b> |
| 11-14            | 0              | 3D             | 14T122     |

Besides hydrogen bonding,  $\pi$ - $\pi$ -interactions play important role in the structure formation.  $\pi$ - $\pi$ -Bonds between two M3 cations appear at the value of  $\Omega_i$  (13%) larger than  $\Omega_i$ , corresponding to DMSO – M3 hydrogen bonding (7%), so intermolecular contacts M3 – M3 is stronger than DMSO – M3 (Figure S14). Thus, we can consider the tetramer PA – M3 – M3 – PA as building unit of the structure.

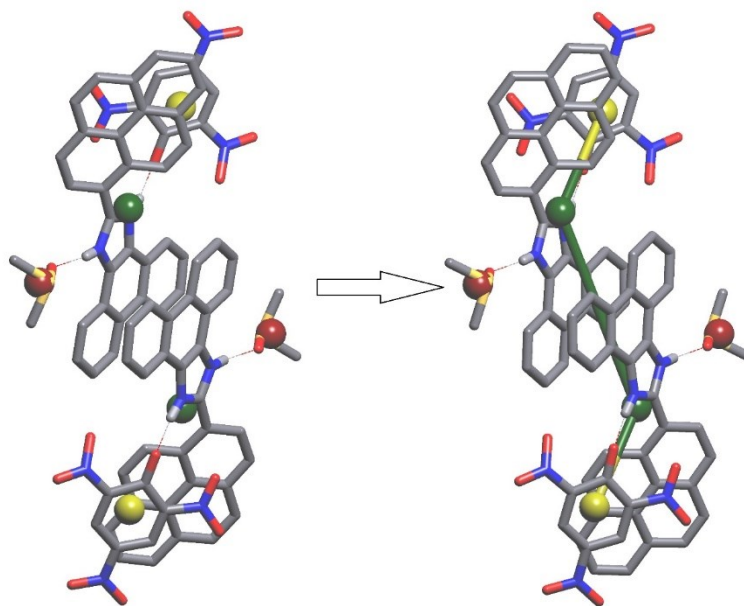

**Figure S14.** Molecular packing of  $\pi$ - $\pi$ -stacked fragments. Red, green and yellow spheres correspond to DMSO, M3 and PA molecular centroids, respectively.

The tetramers form 14-coordinated net with **bcu-x** topology (Figure S15). Information about the  $\Omega_i$ , dimensionality and topology of corresponding subnets is given in Table S13. Using the subroutine Generate Representations implemented in ToposPro, different subnets can be obtained from the underlying net that contain the edges of a weight no less than a specified value (Figure S16).

**Table S13:** Values of the molecular solid angle ( $\Omega_i$ ) and corresponding topological types of the subnets of the  $\pi$ - $\pi$ -dimer packing

| No. of molecules | $\Omega_i$ , % | Dimensionality | Topology     |
|------------------|----------------|----------------|--------------|
| 1, 2             | 18             | 1D             | 2C1          |
| 3 – 6            | 10             | 3D             | <b>Pcu</b>   |
| 7 – 10           | 4              | 3D             | <b>Bct</b>   |
| 11 – 14          | 0              | 3D             | <b>bcu-x</b> |

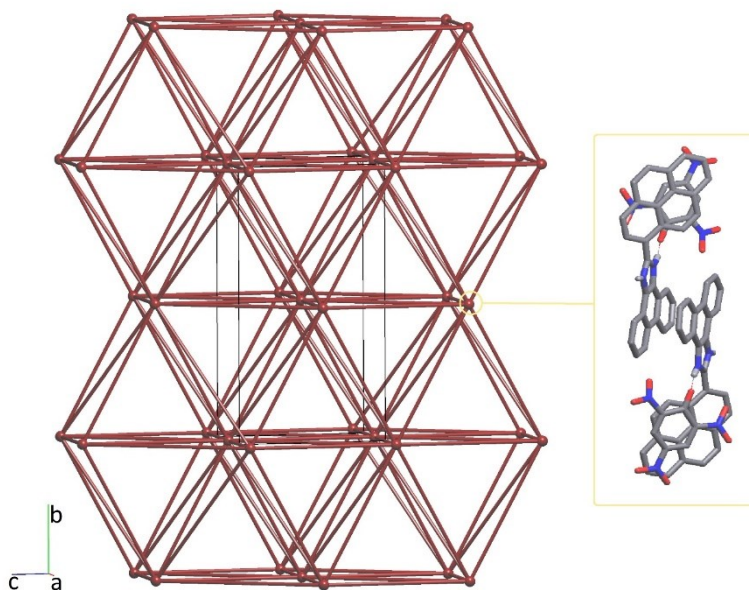

**Figure S15.** Underlying net of the tetramers packing. Red spheres correspond to the tetramers centroids

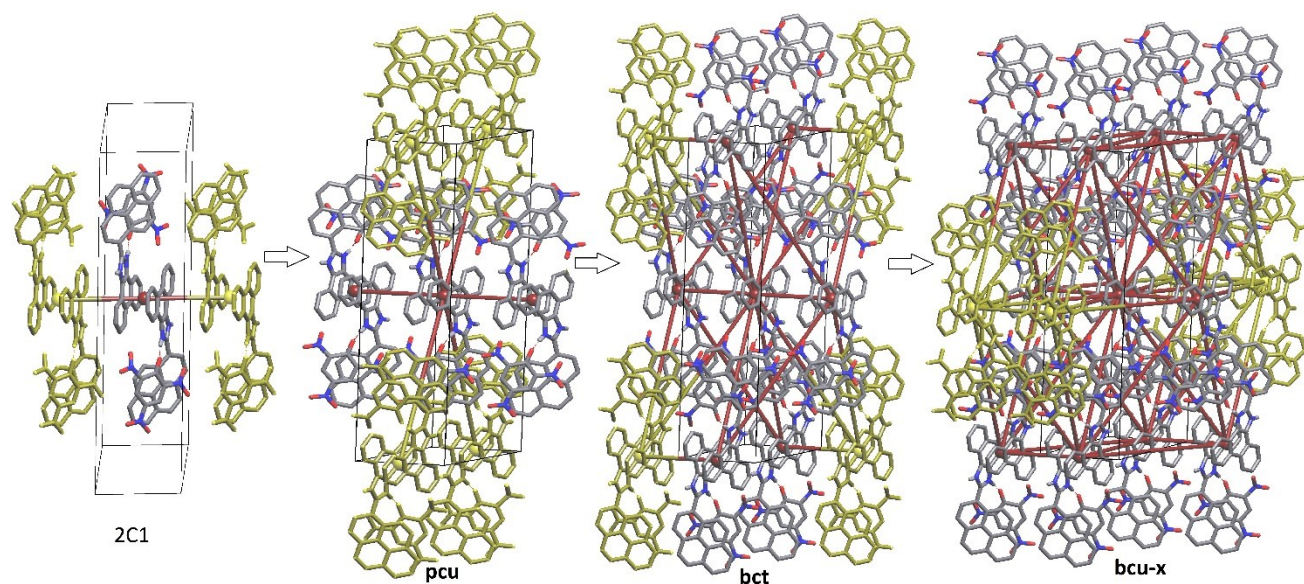

**Figure S16.** Subnets of the initial net corresponding to the tetramers packing in structure at different levels: 2-c 2C1 → 6-c **pcu** → 10-c **bct** → 14-c **bcu-x** net. Highlighted fragments correspond to the  $\pi$ - $\pi$ -bonded dimers, which appear at a given  $\Omega$  value.

## Hirshfeld analysis of M3<sup>+</sup>-PA<sup>-</sup>

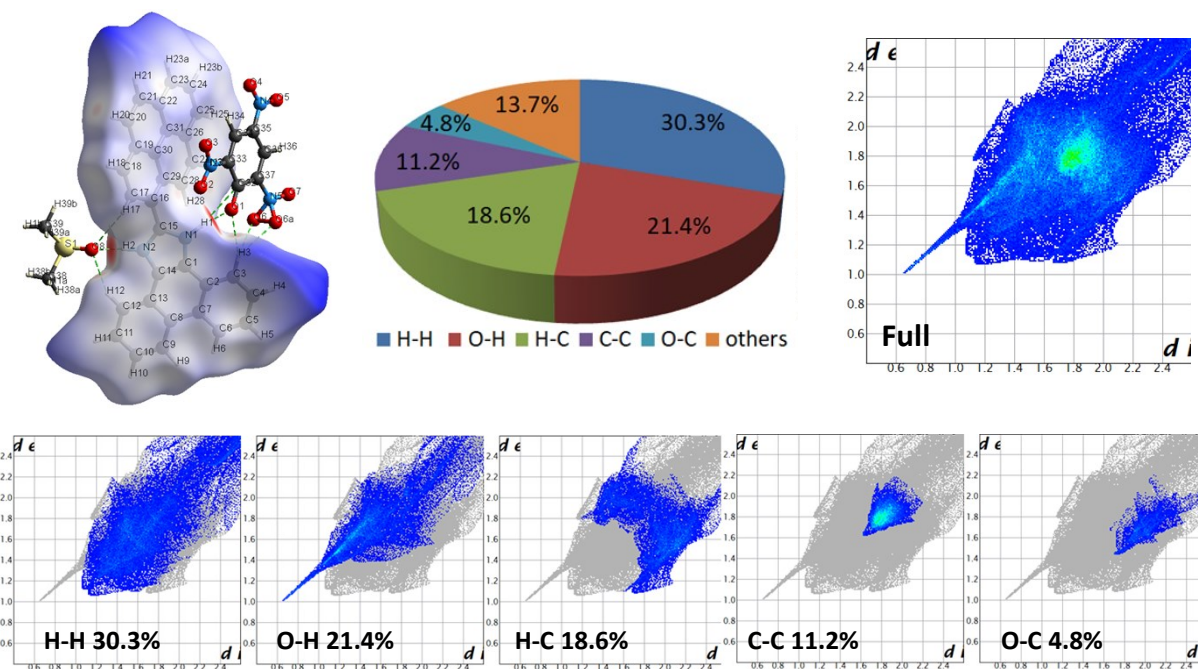

**Figure S17.** Hirschfeld surface for M3 with  $d_{\text{norm}}$  over the range of  $-0.734$  to  $3.069$ . Neighboring molecules (DMSO and PA) associated with close contacts are also shown. Pie chart and FP for overall, other contacts and percentage contribution from different contacts in M3

Hirschfeld surface provides an extended qualitative and quantitative analysis of the interactions between the constituents of complex. The analysis of various interactions in  $M3^+ \cdot PA^-$  reveal the presence  $N1-H1 \dots O1$ ,  $C3-H3 \dots O1$ ,  $C3-H3 \dots O6$ ,  $C3-H3 \dots O6a$ ,  $N1-H1 \dots C32$ , on one side and  $N2-H2 \dots O8$ ,  $C12-H12 \dots O8$ ,  $C17-H17 \dots O8$  hydrogen-bonds, on the opposite side leading to form a three-dimensional complex (Figure S17). Red spots in the Hirschfeld surface of M3 are centered at N1H1, C3H3, N2H2 and C20H20. The red spot reflecting strong electrostatic interactions are centered at N2H2. This has DMSO molecule in its vicinity, which forms electrostatic attraction between M3 unit and DMSO via  $N2-H2 \dots O8$ . On the other side near N1H1 lies the picric acid molecule, which undergo hydrogen bonding interaction involving  $N1-H1 \dots O1$ . The pie chart in figure S17 shows the percentage contribution of various interactions in the complex. The percentage contribution of H...H and H...O is 30.3% and 21.4% respectively. The O...H interaction includes oxygen atoms from the DMSO, nitro and phenoxide groups in  $PA^-$ .

#### Reference:

1. Blatov, V. A., Shevchenko, A. P. & Proserpio, D. M. Applied Topological Analysis of Crystal Structures with the Program Package ToposPro. *Cryst. Growth Des.* **14**, 3576–3586 (2014).
2. Alexandrov, E. V, Blatov, V. A., Kochetkov, A. V & Proserpio, D. M. Underlying nets in three-periodic coordination polymers: topology, taxonomy and prediction from a computer-aided analysis of the Cambridge Structural Database. *CrystEngComm* **13**, 3947–3958 (2011).
3. Blatov, V. A. A method for topological analysis of rod packings. *Struct. Chem.* **27**, 1605–1611 (2016).
4. Aman, F. *et al.* Multilevel topological description of molecular packings in 1,2-benzothiazines. *CrystEngComm* **16**, 1963–1970 (2014).
5. O’Keeffe, M., Peskov, M. A., Ramsden, S. J. & Yaghi, O. M. The Reticular Chemistry Structure Resource (RCSR) Database of, and Symbols for, Crystal Nets. *Acc. Chem. Res.* **41**, 1782–1789 (2008).
